# Supplementary material
Source: PubMed Central journal article supplement (PMC2890781)
Supplement: 1006284107_pnas.201006284SI.pdf [file 1006284107_pnas.201006284SI.pdf]

# Supporting Information

Elledge et al. 10.1073/pnas.1006284107

Table S1. Data collection and refinement statistics (SAD)

|                                                      | CDH23 EC1–EC2       | CDH23 EC1–EC2 (Eu peak L3) |
|------------------------------------------------------|---------------------|----------------------------|
| Data collection                                      |                     |                            |
| Space group                                          | P21                 | P21                        |
| Cell dimensions                                      |                     |                            |
| <i>a</i> , <i>b</i> , <i>c</i> (Å)                   | 38.37, 64.20, 47.85 | 38.38, 64.60, 47.94        |
| $\alpha$ , $\beta$ , $\gamma$ (°)                    | 90, 110.89, 90      | 90, 110.50, 90             |
| Resolution (Å)                                       | 23–1.1              | 44–2.5                     |
| <i>R</i> <sub>sym</sub> or <i>R</i> <sub>merge</sub> | 0.08 (0.49)         | 0.188 (0.33)               |
| <i>I</i> / $\sigma$ <i>I</i>                         | 11.49 (1.51)        | 11.0 (9.63)                |
| Completeness (%)                                     | 92.3 (75.2)         | 96.6 (94.3)                |
| Redundancy                                           | 3.4                 | 7.3                        |
| Figure of merit (RESOLVE)                            |                     | 0.76                       |
| Refinement                                           |                     |                            |
| Resolution (Å)                                       | 23–1.1              | 44–2.5                     |
| No. reflections                                      | 277,629             | 55,283                     |
| <i>R</i> <sub>work</sub> / <i>R</i> <sub>free</sub>  | 0.163/0.187         | 0.169/0.223                |
| No. atoms                                            |                     |                            |
| Protein                                              | 1,667               | 1,580                      |
| Ligand/ion                                           | 28                  | 6                          |
| Water                                                | 279                 | 68                         |
| Avg. <i>B</i> -factors                               |                     |                            |
| Protein                                              | 12.4                | 12.6                       |
| Water                                                | 27.8                | 13.0                       |
| R.m.s. deviations                                    |                     |                            |
| Bond lengths (Å)                                     | 0.0095              | 0.0198                     |
| Bond angles (°)                                      | 1.354               | 1.760                      |

Values in parentheses are for highest-resolution shell. A single crystal was used to collect each data set.
